# Supplementary material for: Combined Therapy Using Human Corneal Stromal Stem Cells and Quiescent Keratocytes to Prevent Corneal Scarring after Injury
Source: MDPI journal article supplement (doi:10.3390/ijms23136980), 2022-06-23
Supplement: s1 [file s1]

## Combined therapy using human corneal stromal stem cells and quiescent keratocytes to prevent corneal scarring after injury

Vishal Jhanji, Mithun Santra, Andri K Riau, Moira L. Geary, Tianbing Yang, Elizabeth Rubin, Nur Zahirah Binte M Yusoff, Deepinder K Dhaliwal, Jodhbir S Mehta, Gary Hin-Fai Yam

### Supplementary Materials

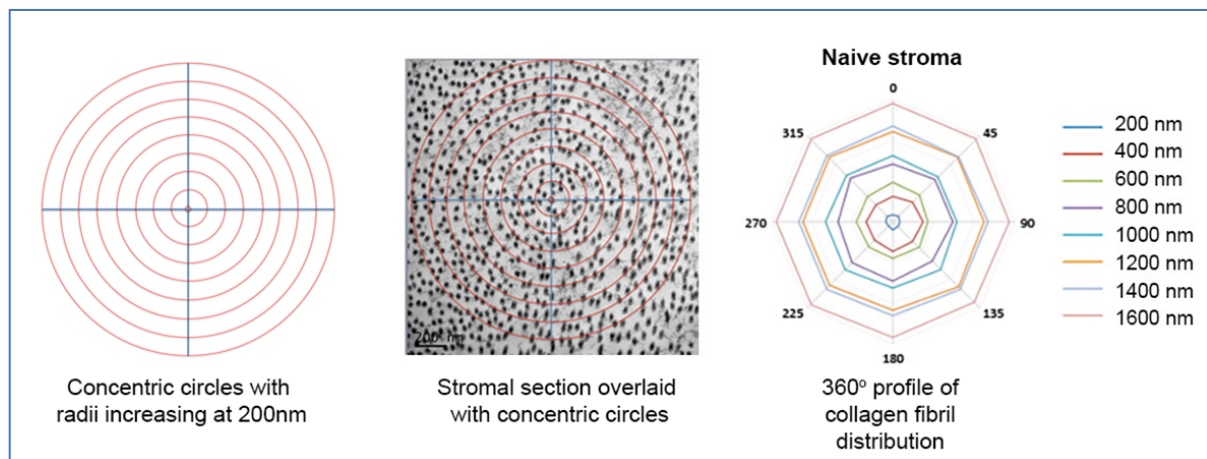

**Supplementary Figure S1.** 360° fibril distribution profile measured by concentric circle analysis method.

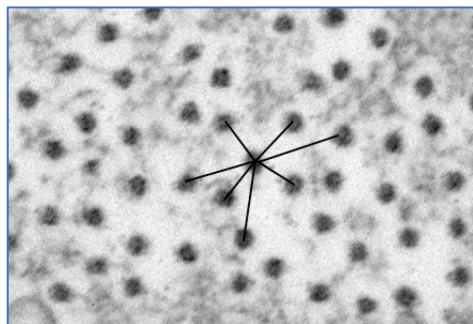

**Supplementary Figure S2.** Measurement of inter-fibrillar distances with a randomly chosen collagen fibril.

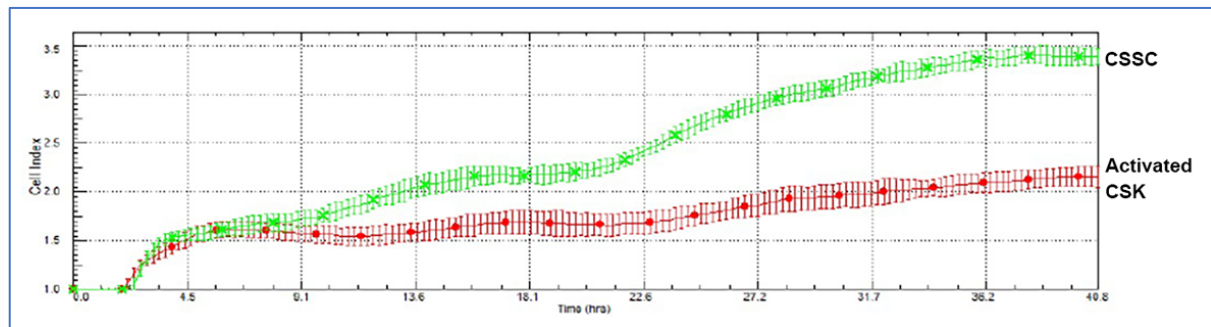

**Supplementary Figure S3. Growth character of primary CSSC versus activated CSK from same donor cornea by xCelligence assay.**

**Supplementary Table S1. Donor cornea information**

| <b>Lab no.</b> | <b>Age</b> | <b>Gender</b> | <b>Cause of Death</b>                  | <b>Hours from death to Optisol</b> | <b>Days in Optisol preservation</b> |
|----------------|------------|---------------|----------------------------------------|------------------------------------|-------------------------------------|
| <b>436</b>     | 33         | M             | Multiple cerebral infarcts             | 5.5                                | 7                                   |
| <b>439</b>     | 57         | F             | Anoxia brain injury                    | 6                                  | 9                                   |
| <b>466</b>     | 51         | F             | Myocardial infarct                     | 6                                  | 8                                   |
| <b>515</b>     | 67         | M             | Atherosclerotic cardiovascular disease | 5.5                                | 6                                   |
| <b>534</b>     | 25         | M             | Head trauma                            | 6.5                                | 9                                   |
| <b>544</b>     | 41         | M             | STEMI heart attack                     | 7.5                                | 8                                   |
| <b>555</b>     | 72         | F             | Decompensated heart failure            | 6.5                                | 12                                  |
| <b>572</b>     | 21         | M             | Anoxia brain injury                    | 9                                  | 10                                  |
| <b>576</b>     | 68         | M             | Myocardial infarct                     | 10                                 | 9                                   |
| <b>577</b>     | 65         | M             | Myocardial infarct                     | 8.5                                | 10                                  |
| <b>621</b>     | 58         | F             | Acute myocardial infarct               | 8                                  | 8                                   |
| <b>624</b>     | 65         | M             | Hypoxic ischemic encephalopathy        | 9.5                                | 10                                  |
| <b>641</b>     | 45         | M             | Gun shot                               | 11                                 | 12                                  |

**Supplementary Table S2. qPCR primers**

|                    | GenBank #    | Forward (5'-3')           | Reverse (5'-3')           |
|--------------------|--------------|---------------------------|---------------------------|
| Mouse ACP5         | NM_013556.1  | GTTGGATACAGGCCAGACTTTGTTG | GATTCAACTTGCCTCATCTTAGGC  |
| Mouse $\alpha$ SMA | NM_009696.3  | TGTGCTGGACTCTGGAGATG      | GAAGGAATAGCCACGCTCAG      |
| Mouse Col3A1       | NM_009930.2  | CGTAAGCACTGGTGGACAGA      | CGGCTGGAAAGAAGTCTGAG      |
| Mouse CTSK         | X94444.1     | ATGTGGGGGCTCAAGGTTCTG     | CATATGGGAAAGCATCTTCAGAGTC |
| Mouse FN1          | NM010233.2   | TACTCGAGCCCTGAGGATGG      | GCAAGGCAACCACACTGACT      |
| Mouse MMP9         | NM_013599.5  | CTTCTGGCGTGTGAGTTTCCA     | ACTGCACGGTTGAAGCAAAGA     |
| Mouse TNC          | NM_035737.2  | GACTGCCCTGGGAACTGTAA      | CATAGCCTTCGAAGCACACA      |
| Mouse TSG-6        | NM_007115.3  | AAGCACGGTCTGGCAAATACAAGC  | ATCCATCCAGCAGCACAGACATGA  |
|                    |              |                           |                           |
| Human ABCG2        | NM_004827    | TGCAACATGTACTGGCGAAGA     | TCTTCCACAAGCCCCAGG        |
| Human ALDH3A1      | NM_001135168 | CATTGGCACCTGGAACCTACC     | GGCTTGAGGACCACTGAGTT      |
| Human AQP1         | NM_198098.2  | AATACCCGGTGGGGAACAAC      | CACACCATCAGCCAGGTCAT      |
| Human $\alpha$ SMA | NM_001613.2  | CTGTTCCAGCCATCCTTCAT      | CCGTGATCTCCTTCTGCATT      |
| Human B3GnT7       | NM_145236.2  | AGTCTACCCCTGGTCAGTT       | AGCAGTTAGTGGTGGTCACG      |
| Human CD34         | NM_001025109 | CCTCAGTGTCTACTGCTGGTCT    | GGAATAGCTCTGGTGGCTTGCA    |
| Human CHST6        | NM_021615.4  | TACCGGCCTGTGTACTCTGA      | ACTAATTTCTGGGGGTGCGAG     |
| Human Col3A1       | NM_000090.3  | TCTTTGAATCCTAGCCCATCTG    | TGTGACAAAAGCAGCCCCATAA    |
| Human CXCR4        | NM_003467    | CTCCTCTTTGTCATCACGCTTCC   | GGATGAGGACACTGCTGTAGAT    |
| Human FN1          | NM_212482.4  | CCACCCCCATAAGGCATAGG      | GTAGGGGTCAAAGCACGAGTCATC  |
| Human Kera         | NM_007035    | ATCTGCAGCACCTTCACCTT      | CATTGGAATTGGTGGTTTGA      |
| Human Lum          | NM_002345.3  | CCTGGTTGAGCTGGATCTGT      | TGGTTTCTGAGATGCGATTG      |
| Human MCP1         | NM_002982.4  | GAGAGGCTGAGACTAACCAGA     | ATCACAGCTTCTTTGGGACACT    |
| Human Nestin       | NM_006617    | GCTCAGGTCTGGAAGGTC        | TAAGAAAGGCTGGCACAGGT      |
| Human Pax6         | NM_001604    | CAATCAAAACGTGTCCAACG      | TAGCCAGGTTGCGAAGAAGT      |
| Human SPARC        | NM_003118.4  | ATCTAAATCCACTCCTTCCACAG   | CACCGTTAATGTATTCATTAAATC  |

**Supplementary Table S3. Antibodies used for immunostaining**

| <b>Antibody anti-mouse epitope [clone]</b> | <b>Source</b>        |
|--------------------------------------------|----------------------|
| $\alpha$ SMA [1A4]                         | Invitrogen MA5-11547 |
| Col3A1 [C-15]                              | Santa Cruz sc-8781   |
| FN                                         | Millipore AB2033     |
| TNC [F-17]                                 | Santa Cruz sc-9872   |

| <b>Antibody anti-human epitope [clone]</b> | <b>Source</b>          |
|--------------------------------------------|------------------------|
| ALDH3A1                                    | Proteintech 15578-1-AP |
| $\alpha$ SMA [1A4]                         | Invitrogen MA5-11547   |
| Col3A1 [C-15]                              | Santa Cruz sc-8781     |
| FN                                         | Millipore AB2033       |
| Keratocan                                  | Sigma HPA039321        |
| Ki67                                       | DAKO M7240             |
| Lum                                        | Sigma HPA001522        |
| TNC [F-17]                                 | Santa Cruz sc-9872     |
